# Supplementary material for: Gene Polymorphisms Among Plasmodium vivax Geographical Isolates and the Potential as New Biomarkers for Gametocyte Detection
Source: Front Cell Infect Microbiol. 2022 Jan 13;11:789417. doi: 10.3389/fcimb.2021.789417 (PMC8793628; doi:10.3389/fcimb.2021.789417)
Supplement: Supplementary File 2 — Accession numbers for the Ethiopia P. vivax transcriptomic data used in gene expression plots. [file DataSheet_2.xlsx]

## Sheet: Supplementary File 3
Plasmodium vivax			South America		Asia		Africa
PVP01 Gene ID	Annotation	Gametocyte type	Hd	Pi	Hd	Pi	Hd	Pi
PVP01_0415800	6-cysteine protein Pvs230	female	0.961039	0.000982998	0.998367	0.00112667	1	0.0012003
PVP01_0616000	ookinete surface protein, Pvs28	female	0.93	0.0014	0.987	0.0025	0.7557	0.00095
PVP01_0616100	ookinete surface protein Pvs25	female	0.246753	0.000373869	0.672653	0.00150402	0.5827	0.0014
PVP01_0727400	guanylate kinase, putative	female	0.623377	0.00140638	0.671837	0.0015926	0.8264	0.0024
PVP01_0734100	gametocyte development protein 1, putative	female	0.874459	0.00423098	0.988571	0.002933	0.9655	0.0028
PVP01_0820000	CPW-WPC family protein	female	0.809524	0.000941423	0.773061	0.000728	0.4886	0.0004
PVP01_1003000	CPW-WPC family protein	female	0.748918	0.000494569	0.902041	0.00116596	0.9264	0.00115201
PVP01_1119300	secreted ookinete protein, putative	female	0.47619	0.000707354	0.447347	0.000410164	0.4833	0.0005
PVP01_1125200	CPW-WPC family protein	female	0.324675	0.000191202	0.777959	0.00090138	0.8399	0.00107504
PVP01_1223200	CPW-WPC family protein	female	0.87013	0.00136217	0.927347	0.00145256	0.796	0.001
PVP01_1302200	high mobility group protein B1, putative	female	-	0	0.0783673	0.000241875	0.325	0.0011
PVP01_1403000	conserved Plasmodium protein, unknown function	female	0.528139	0.00122508	0.382041	0.000643	0.4144	0.001
PVP01_1452800	upregulated in late gametocytes ULG8, putative	female	0.961039	0.00101963	0.997551	0.002159	0.9398	0.001
PVP01_1465500	conserved Plasmodium protein, unknown function	female	0.606061	0.00162825	0.006239	0.000994	0.6108	0.001
PVP01_0305600	parasitophorous vacuole membrane protein S16, putative	male	0.0909091	0.000214915	0.116735	0.000279828	0	0
PVP01_0814300	male gamete fusion factor HAP2	male	0.835498	0.0005092	0.810612	0.000584353	0.8025	0.000536436
PVP01_1119500	CPW-WPC family protein	male	0.52381	0.000232391	0.76898	0.000643	0.8352	0.000803
PVP01_1128100	inner membrane complex protein 1j, putative	male	0.848485	0.000735741	0.791837	0.00085034	0.367	0.0048
PVP01_1208000	6-cysteine protein P47	male	0.597403	0.000628404	0.950204	0.00248785	0.5868	0.0007
PVP01_1208100	6-cysteine protein, Pvs48/45	male	0.688312	0.00134382	0.761633	0.00101905	0.7101	0.0007
PVP01_1215900	CPW-WPC family protein	male	0.896104	0.00128155	0.985306	0.0015054	0.9468	0.0018
PVP01_1258000	gamete egress and sporozoite traversal protein, putative	male	0.787879	0.00104653	0.748571	0.00164722	0.7931	0.0011
PVP01_1262200	fructose 1,6-bisphosphate aldolase, putative	male	0.619048	0.000486866	0.738776	0.0048775	0.2811	0.0003
PVP01_1320100	CPW-WPC family protein	male	0.896104	0.000853693	0.963265	0.000936306	0.941	0.001
PVP01_1344600	conserved Plasmodium protein, unknown function	male	0.454545	0.0010782	0.604898	0.00132844	0.4968	0.000908616
PVP01_1412100	meiosis-specific nuclear structural protein 1, putative	male	0.670996	0.000896057	0.802449	0.001447	0.7236	0.001
