# Supplementary material for: Gene Polymorphisms Among Plasmodium vivax Geographical Isolates and the Potential as New Biomarkers for Gametocyte Detection
Source: Front Cell Infect Microbiol. 2022 Jan 13;11:789417. doi: 10.3389/fcimb.2021.789417 (PMC8793628; doi:10.3389/fcimb.2021.789417)
Supplement: Supplementary File 3 — Nucleotide and haplotype diversity scores of 28 gametocyte genes in the East African, Southeast Asian, and South American P. vivax isolates by DNASP analyses. [file DataSheet_3.xlsx]

## Sheet: PVP01_0616000
Label	Population name
1:	Cambodia
2:	Eritrea
3:	Ethiopia
4:	Panama
5:	Peru
6:	Sudan
7:	Thailand
8:	Uganda
Population pairwise FSTs
1 2 3 4 5 6 7 8
1 0.00000
2 0.13863 0.00000
3 0.27486 0.21745 0.00000
4 0.59605 0.67111 0.72925 0.00000
5 0.53744 0.63625 0.68396 0.31424 0.00000
6 0.17597 0.00850 0.21578 0.67429 0.65951 0.00000
7 0.06260 0.26998 0.37036 0.60777 0.55586 0.27661 0.00000
8 0.07638 0.00105 0.25095 0.70102 0.69925 0.17757 0.19440 0.00000
FST P values
1 2 3 4 5 6 7 8
1 *
2 0.00000+-0.0000 *
3 0.00000+-0.0000 0.00000+-0.0000 *
4 0.00000+-0.0000 0.00000+-0.0000 0.00000+-0.0000 *
5 0.00000+-0.0000 0.00000+-0.0000 0.00000+-0.0000 0.00000+-0.0000 *
6 0.00000+-0.0000 0.45045+-0.0407 0.02703+-0.0194 0.00000+-0.0000 0.00000+-0.0000 *
7 0.00901+-0.0091 0.00000+-0.0000 0.00000+-0.0000 0.00000+-0.0000 0.00000+-0.0000 0.00000+-0.0000 *
8 0.17117+-0.0316 0.50450+-0.0454 0.09009+-0.0235 0.01802+-0.0121 0.03604+-0.0201 0.39640+-0.0474 0.06306+-0.0194 *
Global AMOVA results as a weighted average over loci
------------------------------------------------------------------------
Source of Sum of Variance Percentage
variation squares components variation
------------------------------------------------------------------------
Among
populations 146.780 1.30020 44.10480
Within
populations 202.597 1.64778 55.89520
------------------------------------------------------------------------
Total 349.376 2.94798
------------------------------------------------------------------------
Average F-Statistics over all loci	Significance tests (1023 permutations)
Fixation Indices	Va and FST : P(rand. value > obs. value) = 0.00000
FST : 0.44105	P(rand. value = obs. value) = 0.00000
	P-value = 0.00000

## Sheet: PVP01_1452800
Label	Population name
1:	Cambodia
2:	Eritrea
3:	Ethiopia
4:	Panama
5:	Peru
6:	Sudan
7:	Thailand
8:	Uganda
Population pairwise FSTs
1 2 3 4 5 6 7 8
1 0.00000
2 0.27430 0.00000
3 0.43629 0.01379 0.00000
4 0.30710 0.44927 0.56643 0.00000
5 0.13695 0.33628 0.49832 0.29717 0.00000
6 0.34972 -0.08431 -0.05689 0.66154 0.58188 0.00000
7 0.03138 0.18338 0.35797 0.27652 0.10085 0.27086 0.00000
8 0.28043 -0.16554 -0.14407 0.65525 0.55840 -0.02970 0.20079 0.00000
FST P values
1 2 3 4 5 6 7 8
1 *
2 0.00000+-0.0000 *
3 0.00000+-0.0000 0.21622+-0.0433 *
4 0.00000+-0.0000 0.00000+-0.0000 0.00000+-0.0000 *
5 0.00000+-0.0000 0.00000+-0.0000 0.00000+-0.0000 0.00000+-0.0000 *
6 0.00000+-0.0000 0.76577+-0.0455 0.76577+-0.0512 0.00000+-0.0000 0.00000+-0.0000 *
7 0.00901+-0.0091 0.00000+-0.0000 0.00000+-0.0000 0.00000+-0.0000 0.00000+-0.0000 0.00000+-0.0000 *
8 0.00000+-0.0000 0.77477+-0.0244 0.99099+-0.0030 0.00901+-0.0091 0.04505+-0.0203 0.57658+-0.0594 0.27928+-0.0212 *
Global AMOVA results as a weighted average over loci
Source of Sum of Variance Percentage
variation squares components variation
------------------------------------------------------------------------
Among
populations 143.140 1.20549 32.24406
Within
populations 311.578 2.53315 67.75594
------------------------------------------------------------------------
Total 454.718 3.73864
------------------------------------------------------------------------
Average F-Statistics over all loci				Significance tests (1023 permutations)
Fixation Indices				Va and FST : P(rand. value > obs. value) = 0.00000
FST : 0.32244				P(rand. value = obs. value) = 0.00000
				P-value = 0.00000

## Sheet: PVP01_0616100
Label	Population name
1:	Cambodia
2:	Eritrea
3:	Ethiopia
4:	Panama
5:	Peru
6:	Sudan
7:	Thailand
8:	Uganda
Population pairwise FSTs
1 2 3 4 5 6 7 8
1 0.00000
2 0.25784 0.00000
3 0.42544 0.06221 0.00000
4 0.55948 0.60960 0.55552 0.00000
5 0.49085 0.41046 0.45626 0.10751 0.00000
6 0.25708 -0.11439 0.10495 0.80026 0.47582 0.00000
7 0.04439 0.35300 0.47516 0.63734 0.55462 0.35135 0.00000
8 0.40899 0.04906 -0.05204 1.00000 0.46429 0.16800 0.50342 0.00000
FST P values
1 2 3 4 5 6 7 8
1 *
2 0.00000+-0.0000 *
3 0.00000+-0.0000 0.16216+-0.0227 *
4 0.00000+-0.0000 0.00000+-0.0000 0.00000+-0.0000 *
5 0.00000+-0.0000 0.00000+-0.0000 0.00000+-0.0000 0.00901+-0.0091 *
6 0.00901+-0.0091 0.63964+-0.0479 0.05405+-0.0201 0.00000+-0.0000 0.00000+-0.0000 *
7 0.05405+-0.0242 0.00000+-0.0000 0.00000+-0.0000 0.00000+-0.0000 0.00000+-0.0000 0.00901+-0.0091 *
8 0.00000+-0.0000 0.51351+-0.0471 0.36036+-0.0332 0.03604+-0.0201 0.06306+-0.0305 0.40541+-0.0365 0.01802+-0.0182 *
Global AMOVA results as a weighted average over loci
------------------------------------------------------------------------
Source of Sum of Variance Percentage
variation squares components variation
------------------------------------------------------------------------
Among
populations 67.145 0.59137 42.39736
Within
populations 98.825 0.80345 57.60264
------------------------------------------------------------------------
Total 165.969 1.39482
------------------------------------------------------------------------
Average F-Statistics over all loci				Significance tests (1023 permutations)
Fixation Indices				Va and FST : P(rand. value > obs. value) = 0.00000
FST : 0.42397				P(rand. value = obs. value) = 0.00000
				P-value = 0.00000

## Sheet: PVP01_0734100
Label	Population name
1:	Cambodia
2:	Eritrea
3:	Ethiopia
4:	Panama
5:	Peru
6:	Sudan
7:	Thailand
8:	Uganda
Population pairwise FSTs
1 2 3 4 5 6 7 8
1 0.00000
2 0.08673 0.00000
3 0.09964 0.00119 0.00000
4 0.31176 0.31544 0.29214 0.00000
5 0.19064 0.18483 0.24647 0.15064 0.00000
6 0.08372 0.02326 0.04177 0.31353 0.09773 0.00000
7 0.01812 0.14389 0.14949 0.29169 0.17388 0.11279 0.00000
8 0.07593 -0.00614 -0.01368 0.30120 0.10097 -0.08543 0.09290 0.00000
FST P values
1 2 3 4 5 6 7 8
1 *
2 0.01802+-0.0121 *
3 0.00000+-0.0000 0.39640+-0.0388 *
4 0.00000+-0.0000 0.00000+-0.0000 0.00000+-0.0000 *
5 0.00000+-0.0000 0.00901+-0.0091 0.00000+-0.0000 0.00901+-0.0091 *
6 0.06306+-0.0194 0.28829+-0.0379 0.15315+-0.0385 0.00000+-0.0000 0.11712+-0.0273 *
7 0.11712+-0.0360 0.00000+-0.0000 0.00000+-0.0000 0.00000+-0.0000 0.00000+-0.0000 0.04505+-0.0279 *
8 0.15315+-0.0333 0.51351+-0.0637 0.51351+-0.0692 0.14414+-0.0242 0.18018+-0.0303 0.81081+-0.0138 0.20721+-0.0526 *
Matrix of significant Fst P values
Significance Level=0.0500
====================================================
Global AMOVA results as a weighted average over loci
====================================================
Source of Sum of Variance Percentage
variation squares components variation
------------------------------------------------------------------------
Among
populations 118.483 0.83366 15.30112
Within
populations 564.199 4.61471 84.69888
------------------------------------------------------------------------
Total 682.682 5.44837
------------------------------------------------------------------------
Average F-Statistics over all loci					Significance tests (1023 permutations)
Fixation Indices					Va and FST : P(rand. value > obs. value) = 0.00000
FST : 0.15301					P(rand. value = obs. value) = 0.00000
					P-value = 0.00000

## Sheet: PVP01_1215900
Label	Population name
1:	Cambodia
2:	Eritrea
3:	Ethiopia
4:	Panama
5:	Peru
6:	Sudan
7:	Thailand
8:	Uganda
------------------------
Population pairwise FSTs
1 2 3 4 5 6 7 8
1 0.00000
2 0.21977 0.00000
3 0.32365 0.00694 0.00000
4 0.12002 0.23774 0.30408 0.00000
5 0.07843 0.23304 0.30781 0.23983 0.00000
6 0.20838 -0.08225 -0.04669 0.22328 0.24162 0.00000
7 0.01905 0.25398 0.34851 0.14491 0.10463 0.25519 0.00000
8 0.21291 -0.22915 -0.19599 0.23768 0.26391 -0.37931 0.24423 0.00000
FST P values
1 2 3 4 5 6 7 8
1 *
2 0.00000+-0.0000 *
3 0.00000+-0.0000 0.34234+-0.0379 *
4 0.00000+-0.0000 0.00901+-0.0091 0.00000+-0.0000 *
5 0.00000+-0.0000 0.00000+-0.0000 0.00000+-0.0000 0.00000+-0.0000 *
6 0.00901+-0.0091 0.79279+-0.0379 0.68468+-0.0310 0.02703+-0.0139 0.03604+-0.0201 *
7 0.03604+-0.0148 0.00000+-0.0000 0.00000+-0.0000 0.00000+-0.0000 0.00000+-0.0000 0.00000+-0.0000 *
8 0.09910+-0.0370 0.99099+-0.0030 0.99099+-0.0030 0.13514+-0.0279 0.00000+-0.0000 0.99099+-0.0030 0.08108+-0.0212 *
------------
Matrix of significant Fst P values
Significance Level=0.0500
====================================================
Global AMOVA results as a weighted average over loci
====================================================
Source of Sum of Variance Percentage
variation squares components variation
------------------------------------------------------------------------
Among
populations 130.355 1.03099 23.80445
Within
populations 405.912 3.30010 76.19555
------------------------------------------------------------------------
Total 536.267 4.33109
------------------------------------------------------------------------
Average F-Statistics over all loci					Significance tests (1023 permutations)
Fixation Indices					Va and FST : P(rand. value > obs. value) = 0.00000
FST : 0.23804					P(rand. value = obs. value) = 0.00000
					P-value = 0.00000

## Sheet: PVP01_0415800
Label	Population name
1:	Cambodia
2:	Eritrea
3:	Ethiopia
4:	Panama
5:	Peru
6:	Sudan
7:	Thailand
8:	Uganda
Population pairwise FSTs
1 2 3 4 5 6 7 8
1 0.00000
2 0.35475 0.00000
3 0.38395 0.09667 0.00000
4 0.27156 0.31454 0.36609 0.00000
5 0.31021 0.33806 0.35324 0.33178 0.00000
6 0.26801 0.13290 0.12584 0.29938 0.35381 0.00000
7 0.05947 0.36755 0.37376 0.32165 0.33536 0.26913 0.00000
8 0.38275 0.11375 0.14442 0.43215 0.53274 0.28908 0.40165 0.00000
FST P values
1 2 3 4 5 6 7 8
1 *
2 0.00000+-0.0000 *
3 0.00000+-0.0000 0.00000+-0.0000 *
4 0.00000+-0.0000 0.00000+-0.0000 0.00000+-0.0000 *
5 0.00000+-0.0000 0.00000+-0.0000 0.00000+-0.0000 0.00000+-0.0000 *
6 0.00000+-0.0000 0.20721+-0.0333 0.02703+-0.0194 0.00901+-0.0091 0.00000+-0.0000 *
7 0.00000+-0.0000 0.00000+-0.0000 0.00000+-0.0000 0.00000+-0.0000 0.00000+-0.0000 0.00000+-0.0000 *
8 0.00901+-0.0091 0.73874+-0.0425 0.32432+-0.0546 0.00901+-0.0091 0.02703+-0.0139 0.30631+-0.0433 0.02703+-0.0139 *
Matrix of significant Fst P values
Significance Level=0.0500
====================================================
Global AMOVA results as a weighted average over loci
====================================================
Source of Sum of Variance Percentage
variation squares components variation
------------------------------------------------------------------------
Among
populations 566.933 2.54305 31.98692
Within
populations 1372.543 5.40723 68.01308
------------------------------------------------------------------------
Total 1939.476 7.95028
------------------------------------------------------------------------
Average F-Statistics over all loci					Significance tests (1023 permutations)
Fixation Indices					Va and FST : P(rand. value > obs. value) = 0.00000
FST : 0.31987					P(rand. value = obs. value) = 0.00000
					P-value = 0.00000

## Sheet: PVP01_1320100
Label	Population name
1:	Cambodia
2:	Eritrea
3:	Ethiopia
4:	Panama
5:	Peru
6:	Sudan
7:	Thailand
8:	Uganda
Population pairwise FSTs
1 2 3 4 5 6 7 8
1 0.00000
2 0.22161 0.00000
3 0.22635 0.06694 0.00000
4 0.13031 0.12561 0.14946 0.00000
5 0.37321 0.18907 0.16903 0.27922 0.00000
6 0.11865 0.08934 0.18021 0.11481 0.38637 0.00000
7 0.07595 0.17278 0.15772 0.10687 0.30282 0.12937 0.00000
8 0.19279 0.10094 0.18107 0.17490 0.42642 0.08280 0.15821 0.00000
FST P values
1 2 3 4 5 6 7 8
1 *
2 0.00000+-0.0000 *
3 0.00000+-0.0000 0.13514+-0.0203 *
4 0.00000+-0.0000 0.00901+-0.0091 0.00000+-0.0000 *
5 0.00000+-0.0000 0.00000+-0.0000 0.00000+-0.0000 0.00000+-0.0000 *
6 0.14414+-0.0201 0.52252+-0.0297 0.01802+-0.0121 0.27027+-0.0429 0.00901+-0.0091 *
7 0.00000+-0.0000 0.00000+-0.0000 0.00000+-0.0000 0.00000+-0.0000 0.00000+-0.0000 0.06306+-0.0237 *
8 0.14414+-0.0411 0.54955+-0.0613 0.11712+-0.0273 0.27928+-0.0344 0.00901+-0.0091 0.99099+-0.0030 0.29730+-0.0333 *
Matrix of significant Fst P values
Significance Level=0.0500
====================================================
Global AMOVA results as a weighted average over loci
====================================================
Source of Sum of Variance Percentage
variation squares components variation
------------------------------------------------------------------------
Among
populations 156.539 0.65290 18.08794
Within
populations 750.940 2.95669 81.91206
------------------------------------------------------------------------
Total 907.480 3.60960
------------------------------------------------------------------------
Average F-Statistics over all loci					Significance tests (1023 permutations)
Fixation Indices					Va and FST : P(rand. value > obs. value) = 0.00000
FST : 0.18088					P(rand. value = obs. value) = 0.00000
					P-value = 0.00000
